# Supplementary material for: Evolutionary expansion of apical extracellular matrix is required for the elongation of cells in a novel structure
Source: eLife. 2020 Apr 27;9:e55965. doi: 10.7554/eLife.55965 (PMC7266619; doi:10.7554/eLife.55965)
Supplement: Figure 2—source data 1. [file elife-55965-fig2-data1.xlsx]

## Sheet: Figure 2F D. mel vs D. bia
D. melanogaster ventral side of posterior lobe
height in um
36 hours	44 hours	52 hours
35.8309	42.0277	78.2833
30.8281	42.6535	73.8885
35.2646	41.2083	89.2902
28.5781	44.4243	74.5897
38.2853	49.0096	78.5742
28.854	48.443	68.4455
34.9739	48.9935	86.2076
32.7771	41.6904	79.9166
30.3766	42.8351	87.8256
31.1762	43.1743	84.9326
D. biarmipes approximate location where posterior lobe would form
height in um
36 hours	44 hours	52 hours
27.1314	27.7729	26.046
31.3172	27.4529	24.8524
32.062	25.9699	31.6132
27.7207	24.8196	24.1101
21.1113	22.0716	30.0486
20.6707	23.193	30.3574
31.5715	33.6689	27.4632
29.1121	26.76	25.566
28.971	26.2909	22.7958
	18.5129	31.0673

## Sheet: Figure 2G Lateral Plate vs Lob
D. melanogaster lateral plate
height in um
36 hours	44 hous	48 hours	52 hours
31.0944	33.0284		37.3138
37.6764	31.0339	27.1658	42.0038
35.4739	29.657	25.8773	54.122
30.1277	24.6463	24.873	38.9379
29.7078	28.7583	28.4628	36.5615
39.7207	31.6994	31.5621	42.5777
36.5586	36.6744	32.4281	45.3811
39.0477	28.7034	23.0396	48.3198
31.0199	27.1507	30.162	46.1994
38.7428	26.9992	30.1886	36.5564
D. melanogaster posterior lobe
height in um
36 hours	44 hous	48 hours	52 hours
35.8309	42.0277	58.945	78.2833
30.8281	42.6535	48.7795	73.8885
35.2646	41.2083	53.6993	89.2902
28.5781	44.4243	45.359	74.5897
38.2853	49.0096	47.9432	78.5742
28.854	48.443	54.7362	68.4455
34.9739	48.9935	48.1439	86.2076
32.7771	41.6904	48.6495	79.9166
30.3766	42.8351	49.458	87.8256
31.1762	43.1743	45.8275	84.9326
