# Supplementary material for: Evolutionary expansion of apical extracellular matrix is required for the elongation of cells in a novel structure
Source: eLife. 2020 Apr 27;9:e55965. doi: 10.7554/eLife.55965 (PMC7266619; doi:10.7554/eLife.55965)
Supplement: Figure 6—source data 1. [file elife-55965-fig6-data1.xlsx]

## Sheet: 25C Dumpy RNAi
dumpy RNAi 25C
Sample number	Left Lobe Area in um	Left Lobe Ventral Height	Class	Right Lobe Area in um	Right Lobe Ventral Height	Class
1	1508.2	49.2907	3	1077.85	51.3614	5
2	1849.53	55.5474	3	1777.92	53.1163	3
3	1590.69	55.3424	4	1752.56	54.7492	3
4	2068.81	62.6923	2	1717.06	56.0386	3
5	2002.41	49.1544	3	1826.12	51.6328	3
6	2015.51	56.3202	3	1797.47	47.2169	3
7	1600.51	53.6785	3	1414.54	52.3984	3
9	1547.13	45.9472	2	1659.65	59.1916	2
10	1851.31	54.6373	3	1489.69	59.9093	5
11	1309.08	43.6477	2	1250.37	48.5894	3
12	1008.23	51.4172	5	1750.97	52.6736	3
13	2005.87	59.1094	3	1953.61	56.4196	3
14	1704.91	61.6774	3	2066.76	54.8426	3
15	1506.39	52.4164	2	1713.46	53.6628	3
16	1547.62	62.8709	4	1264.74	51.6883	2
17	1642.14	50.8818	3	1586.31	58.3832	3
18	1411.81	51.0405	4	1313.86	50.5984	3
19	1609.46	56.236	3	1252.9	58.2634	5
20	1564.81	54.5544	3	1130.25	51.0987	2
22	1657.78	61.0409	3	1446.41	46.9696	3
23	2005.12	59.5115	3	1671.88	60.9851	3
24	1874.69	63.8327	4	2448.63	69.3693	3
25	1516.23	59.4862	5	1893.7	61.2732	4
26	1140.36	52.5515	2	1377	59.5717	4
27	1998.07	66.9543	3	1685.93	55.0959	3
28	1885.69	55.248	3	1773.49	58.3112	3
29	1877.97	59.8259	4	1880.71	64.4869	3
30	1407.57	52.3324	2	1027.84	22.28	5
31	2042.49	64.4857	3	1541.72	54.3871	3
32	1306.17	50.7236	3	1750.95	57.1497	3
33	1501.49	49.918	3	1329.66	45.882	3
34	1515.2	52.7202	2	1907.26	56.7669	3
Highlighted in yellow are the samples used in quantification where only one lobe per sample was used

## Sheet: 29C Dumpy RNAi
dumpy RNAi 29C
Sample number	Left Lobe Area in um	Left Lobe Ventral Height	Class	Right Lobe Area in um	Right Lobe Ventral Height	Class
1	1507.68	51.023	3	1090.75	49.2823	5
2	1436.65	58.483	4	1605.46	57.2303	3
3	1239.23	58.3002	4	1231.57	45.2309	2
4	1338.27	48.0593	3	1095.5	45.1544	3
5	1180.78	51.5142	2	913.046	50.7695	5
6	1273	44.8724	3	959.66	50.2079	5
7	911.693	33.3559	3	1260.48	50.0041	4
8	1227.25	58.109	4	983.125	58.9029	5
10	1251.03	50.4175	4	1396.63	56.2215	4
11	1231.57	58.237	4	1311.5	51.8228	3
13	1246.66	53.5315	4	1450.13	52.4714	4
14	1295.69	57.4396	4	1175.11	57.2397	5
16	1462.11	52.5232	3	1849.3	60.6143	4
17	1200.82	56.6961	3	1157.37	51.5201	4
18	958.911	36.817	5	1000.89	48.4755	4
19	1424.62	54.7132	4	1550.09	54.4247	4
20	1463.92	65.1974	4	1318.06	63.0367	4
21	1468.3	54.4882	4	1385.15	48.7603	3
22	1121.79	43.5262	3	1485.6	47.7086	3
23	1075	44.9767	3	1487.7	50.0322	3
24	1425.48	56.0505	4	1470.6	59.469	4
25	1536.33	49.8272	2	1636.79	50.5776	3
26	1334.82	60.4037	4	951.915	60.1549	4
27	1407.78	45.5916	4	1023.32	51.8336	5
28	1406.39	51.0631	4	1100.94	56.6464	2
29	1193.05	53.3264	2	1355.32	46.9107	3
30	1737.1	54.5544	3	1524.38	50.4236	3
31	1145.68	55.198	4	915.004	40.0346	4
32	1214.84	47.7119	4	1371.73	62.8175	2
35	989.661	53.4592	5	714.843	34.1056	4
Highlighted in yellow are the samples used in quantification where only one lobe per sample was used

## Sheet: 25C mCherry RNAi
mCherry RNAi 25C
Sample number	Left Lobe Area in um	Left Lobe Ventral Height	Class	Right Lobe Area in um	Right Lobe Ventral Height	Class
1	3494.66	61.911	1	3202.37	62.0192	1
2	3119.42	58.4182	1	3210.89	62.3136	1
3	3477.79	65.3561	1	3483.75	68.186	1
4	3560.17	61.5511	1	3131.6	60.6978	1
5	3304.58	62.8098	1	3460.14	61.3153	1
6	3246.48	58.4024	1	3227.99	60.4693	1
8	3109	59.2875	1	3015.6	57.135	1
9	3025.67	60.4591	1	3271.27	58.9941	1
11	3480.41	68.2771	1	3437.6	66.9692	1
12	3160.59	63.2782	1	3453.92	60.6164	1
13	3093.71	61.9742	1	3078.31	64.2484	1
14	3305.13	63.1795	1	3228.97	61.2351	1
15	3244.66	59.0886	1	3171.62	59.6975	1
17	3225.83	59.5666	1	3118.27	61.9279	1
18	2944.39	59.8619	1	3112.88	59.2396	1
19	3202	55.3424	1	3165.66	60.4145	1
20	3529.13	59.0561	1	3551.79	63.031	1
22	3251.57	61.1779	1	2955.91	57.396	1
23	3162	63.0404	1	3002.3	61.4479	1
24	2991.47	54.9726	1	2849.04	55.2943	1
25	3499.79	64.0329	1	2887.33	56.4976	1
26	3120.89	58.4038	1	3194.14	62.5677	1
27	3223.68	61.2431	1	3370.17	62.1359	1
29	3191.4	62.3378	1	2999.04	61.4933	1
30	3109.92	61.0409	1	3228.89	62.6069	1
31	3388.88	66.5755	1	3276.13	63.4874	1
41	2900.57	55.7919	1	3374.86	57.5176	1
40	3362.34	52.7086	1	2997.95	53.0396	1
38	3210.69	58.6246	1
Highlighted in yellow are the samples used in quantification where only one lobe per sample was used

## Sheet: 29C mCherry RNAi
mCherry RNAi 29C
Sample number	Left Lobe Area in um	Left Lobe Ventral Height	Class	Right Lobe Area in um	Right Lobe Ventral Height	Class
1	3037.39	59.6769	1	2998.41	58.9281	1
2	3104.77	60.3019	1	3002.61	58.8716	1
3	3439.18	60.8124	1	2953.21	56.5374	1
4	3084.32	62.1721	1	3151.12	60.5019	1
7	3596.33	60.5458	1	3463.19	60.3121	1
10	3529.1	61.0636	1	3581.04	57.748	1
11	3318.11	60.6025	1	3209.63	55.8616	1
12	3313.65	59.5704	1	3559.27	57.2034	1
13	3496.05	57.8494	1	3405.87	58.4568	1
15	2850.27	61.1042	1	3058.7	57.6034	1
16	3146.23	59.8687	1	2992.3	57.9131	1
19	3178.39	58.441	1	3076.84	62.0237	1
25	3034.31	62.9608	1	3042.14	63.9929	1
26	2975.23	59.691	1	3201.79	60.9566	1
27	3256.15	56.6622	1	3217.69	58.3972	1
28	3086.51	61.4721	1	3184.86	52.9817	1
29	3115.94	66.9864	1	2703.12	58.2036	1
30	3036.01	61.2318	1	3378.92	67.5873	1
31	2584.53	58.3621	1	3264.79	67.3312	1
32	3189.7	62.8554	1	3205.85	61.2464	1
34	3259.75	58.879	1	2829.54	54.6373	1
36	3471.8	59.5326	1	3284.8	56.0834	1
37	3114.84	62.4116	1	2728.14	59.0197	1
38	3446.93	63.6645	1	2965.79	57.2678	1
39	2952.2	56.9663	1	2886.15	54.751	1
40	3050.26	61.0439	1	2951.42	53.4645	1
41	3338.01	61.4367	1	3114.99	58.9029	1
42	2777.32	58.4055	1	2685.44	54.3744	1
Highlighted in yellow are the samples used in quantification where only one lobe per sample was used
