# Supplementary material for: Evolutionary expansion of apical extracellular matrix is required for the elongation of cells in a novel structure
Source: eLife. 2020 Apr 27;9:e55965. doi: 10.7554/eLife.55965 (PMC7266619; doi:10.7554/eLife.55965)
Supplement: Figure 7—source data 1. [file elife-55965-fig7-data1.xlsx]

## Sheet: Sheet1
Tip height in um
Sample	mCherry RNAi 44 hour	dumpy RNAi 44 hour	mCherry RNAi 52 hour	dumpy RNAI 52 hour
1	57.1067	54.5938	80.5983	80.8813
2	58.6694	43.8021	71.4439	88.2179
3	54.4546	41.7777	83.1682	83.1511
4	41.2916	46.875	97.3859	61.3335
5	56.7832	38.5678	88.8116	85.5877
6	39.1997	42.4176		70.5165
7	50.304	51.2281	93.8395	69.0069
8	48.3374	40.1545	86.1826	83.4393
9		45.3302	66.2365	84.0743
10	55.212	51.8917	86.1747	70.705
11	51.4002	57.3626	91.4403
12	51.9794		88.3993
base height in um
Sample	mCherry RNAi 44 hour	dumpy RNAi 44 hour	mCherry RNAi 52 hour	dumpy RNAI 52 hour
1	44.1193	29.0945	61.2139	53.5186
2	37.4645	31.1912	58.6858	62.4641
3	35.8573	27.6277	64.5158	49.8273
4	34.4607	31.1341	72.5079	48.9947
5	40.6375	26.4997	73.8076	44.5326
6	28.5946	28.7499		45.2757
7	42.4169	28.0132	73.662	44.8255
8	40.0575	30.2205	67.0654	60.4559
9		29.5492	52.758	58.2476
10	36.3691	33.5775	64.7835	55.5908
11	43.3155	37.8147	81.8739
12	36.1821		61.1126
